# Supplementary material
Source: publisher figshare collection journal article supplement (https://acs.figshare.com/ndownloader/files/4781122)
Supplement: Supplementary file 1 [file 4781122]

## Supporting material:

### 1. *TiO<sub>2</sub>-film electrodes*

The electrodes were prepared as follows: colloidal TiO<sub>2</sub><sup>1</sup> paste (NTera, Dublin) was coated on FTO glass modified electrodes (F-doped SnO<sub>2</sub>, 15 Ω/cm<sup>2</sup>, cleaned according to *Hillebrandt et al.*<sup>2</sup>) from LOF using the doctor-blade method to yield 3-5 μm thick mesoporous TiO<sub>2</sub> films. After firing at 450 °C the plates were cut into 20 mm x 10 mm pieces with an active TiO<sub>2</sub> surface of 1 cm<sup>2</sup>.<sup>3</sup>

### 2. *Electrode surface modification*

**E-1, E-2 and E-3:** 2 mg of (1), (2) or (3) per ml were dissolved each in a solution of EtOH / H<sub>2</sub>O (95:5 v/v). TiO<sub>2</sub> electrodes were exposed to these solutions for 1 h at r.t. The electrodes were then rinsed with the EtOH/H<sub>2</sub>O.

**E-6:** TiO<sub>2</sub> electrodes were exposed to a solution of trimesic acid chloride (6), Fluka, (c = 20 mM) in toluene for 60 min at 60 °C, and then rinsed with toluene.

**E-7:** The TiO<sub>2</sub> electrodes were functionalized with the phosphonic acid (7) as described by *Felderhoff et al.*<sup>4</sup>.

**E-6-(4-6)<sub>n</sub>:** **E-6** was exposed to a solution of the dicyano-cob(III)yrin-heptol (4) 2 mg/ml in MeCN for 1h at 60 °C and then treated with 6 (c = 20 mM) in toluene for 60 min at 60 °C (see Scheme 2) to yield **E-6-(4-6)<sub>1</sub>**. This electrode was then treated with a solution of 4 (2mg/ml) in MeCN for 1h at 60 °C, followed by a treatment with 6 (c = 20 mM) in toluene for 60 min at 60 °C to yield **E-6-(4-6)<sub>2</sub>**. The same reaction sequence was repeated again to yield **E-6-(4-6)<sub>3</sub>**. Between each reaction step the electrode was rinsed with the pure solvent of the precedent step.

**E-7-(5-8)<sub>n</sub>:** **E-7** was exposed to a solution of dicyano-cob(III)yrin-hexaiodide (5) (4 mg/ml in MeCN) for 6h at 60 °C (see Scheme 2), followed by a treatment of the

electrode in 50 mM bipyridine (**8**) for 6h at 60 °C in MeCN to yield **E-7-(5-8)<sub>1</sub>** (at this time the reaction was stopped). The procedure was repeated once or twice to yield **E-7-(5-8)<sub>2</sub>** and **E-7-(5-8)<sub>3</sub>**, respectively. Between each reaction step the electrode was rinsed with the pure solvent of the precedent step.

## **2. Analytical Electrochemistry and Spectroelectrochemistry**

*Solvents:* Propylene carbonate from *Merck* was freshly distilled, MeCN (synthesis grade) was used as purchased from *Fluka*. *Chemicals:* Trimesic acid chloride, TBAP, LiClO<sub>4</sub>, C<sub>2</sub>H<sub>4</sub>Br<sub>2</sub> were purchased from *Fluka* and *trans*-1,2-dibromocyclohexane (DBCH) was from *Aldrich*. CVs were measured under Ar with the potentiostat PGSTAT 20 from AUTOLAB controlled by a PC running GPES version 4.2 (ECO Chemie 1995) under Windows. The reference electrode was Ag/AgCl/KCl (sat.), separated from the cell by a salt bridge (0.5 TBAP/PC), the counter electrode was a Pt-wire. The electrodes **E-1** (modified with aquo-cyano-cob(III)ester-c-acid perchlorate (monoacid)), **E-2** (modified with dicyano-cob(III)ester-c-EDTA-amide (triacide)), and **E-3** (modified with dicyano-cob(III)yrin-heptaacide (heptaacide)), i.e. all electrodes with coordinatively adsorbed B<sub>12</sub> monolayers lacking cross-linking, were studied in PC (0.5 M TBAP) by CV in presence of 0.1 % acetic acid (Tabel 1).

## **3. Controlled Potential Electrolysis.**

A two-compartments cell was used with cathode and anode compartments connected by a medium-porosity glass frit. Prior to electrolysis, the working electrode compartment was purged with argon.

Reduction of 1,2-dibromoethane (DBEt) and dibromocyclohexane (DBCH) was performed using TiO<sub>2</sub>-modified electrodes of with geometric areas of 0.5 to 1 cm<sup>2</sup> in a cell with a glass frit separated counter electrode compartment. The electrolysis

solution contained 232  $\mu\text{mol}$  of DBEt and 73 (146)  $\mu\text{mol}$  of DBCH in 5 ml of solvent/electrolyte (0,5M TBAP/PC). Electrolysis was performed at -1.1 V vs. Ag/AgCl under stirred electrolyte conditions.

#### **4. Determination of surface concentrations**

All surface-confined vitamin B<sub>12</sub> derivatives were studied on rectangular OTE's of 0.5 to 1 cm<sup>2</sup> active surface. UV-vis spectra were measured with a *Hewlett-Packard* 8453 spectrophotometer. The blank spectrum was from a TiO<sub>2</sub>-coated electrode in air. Surface concentrations were calculated from spectral changes using

$$A = \varepsilon \cdot \Gamma \cdot 1000$$

A = absorbance,  $\varepsilon$  = extinction coefficient ( $\varepsilon$  = 2512 at 525 nm, for non-cyanized and  $\varepsilon$  = 12880 at 613 nm for cyanized B<sub>12</sub>-derivatives), and  $\Gamma$  = surface concentration.

Axial dicyano coordination at the Co(III)-center was established by incubation of the electrode for some seconds in a KCN-saturated ethanolic solution prior to the UV-vis absorption measurement.

Electrochemically,  $\Gamma$  was determined from the coulometric analysis of the cyclic voltammograms at 20 mV/s or 5 mV/s yielding Q and using

$$\Gamma = Q / E_a \cdot F$$

with  $E_a$  = electrode surfaces, F = Faraday constant.

#### References:

1. Cummins, D.; Boschloo, G.; Ryan, M.; Corr, D.; Rao, S. N.; Fitzmaurice, D., *J Phys Chem B* **2000**, 104, (48), 11449-11459.

2. Hillebrandt, H.; Wiegand, G.; Tanaka, M.; Sackmann, E., *Langmuir* **1999**, 15, (24), 8451-8459.
3. Campus, F.; Bonhote, P.; Gratzel, M.; Heinen, S.; Walder, L., *Sol Energ Mat Sol C* **1999**, 56, (3-4), 281-297.
4. Felderhoff, M.; Heinen, S.; Molisho, N.; Webersinn, S.; Walder, L., *Helv. Chim. Acta* **2000**, 83, (1), 181-192.
